# Supplementary material
Source: PubMed Central journal article supplement (PMC5554734)
Supplement: NIHMS875480-supplement-Supplementary_Information.pdf [file NIHMS875480-supplement-Supplementary_Information.pdf]

## Electronic Supplementary Data

### Development of a New Folate-Derived Ga-68 Based PET Imaging Agent

#### Journal: Molecular Imaging and Biology

Christian Brand,<sup>1</sup> Valerie Longo,<sup>2</sup> Mike Groaning,<sup>3</sup> Wolfgang A. Weber,<sup>\*,1,4,5</sup> Thomas Reiner,<sup>\*,1,5</sup>

<sup>1</sup> Department of Radiology, Memorial Sloan Kettering Cancer Center, New York, NY, 10065, USA.

<sup>2</sup> Small-Animal Imaging Core Facility, Memorial Sloan Kettering Cancer Center, New York, NY, 10065, USA.

<sup>3</sup> Endocyte, Inc., West Lafayette, Indiana, 47906, USA.

<sup>4</sup> Molecular Pharmacology & Chemistry Program, Memorial Sloan Kettering Cancer Center, New York, NY, USA.

<sup>5</sup> Weill Cornell Medical College, New York, NY, 10065, USA.

All author emails:

Christian Brand (brandc@mskcc.org), Valerie Longo (longov@mskcc.org), Mike Groaning (mgroaning@Endocyte.com), Wolfgang A. Weber (weberw@mskcc.org), Thomas Reiner (reinert@mskcc.org)

\* Corresponding author: T. Reiner, PhD.

Department of Radiology, Memorial Sloan Kettering Cancer Center, 1275 York Avenue, New York, NY 10065.

Email: reinert@mskcc.org

\* Corresponding author: W. Weber, MD.

Department of Radiology, Memorial Sloan Kettering Cancer Center, 1275 York Avenue, New York, NY 10065.

Email: weberw@mskcc.org

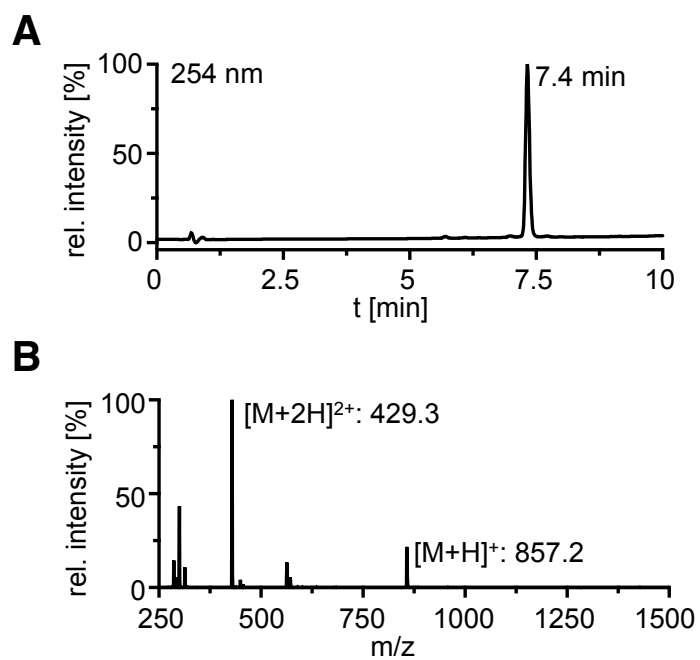

**Figure S1.** Analysis of folate-NOTA: (A) UV-absorption HPLC trace at 254 nm. (B) ESI-MS spectrum of folate-NOTA.

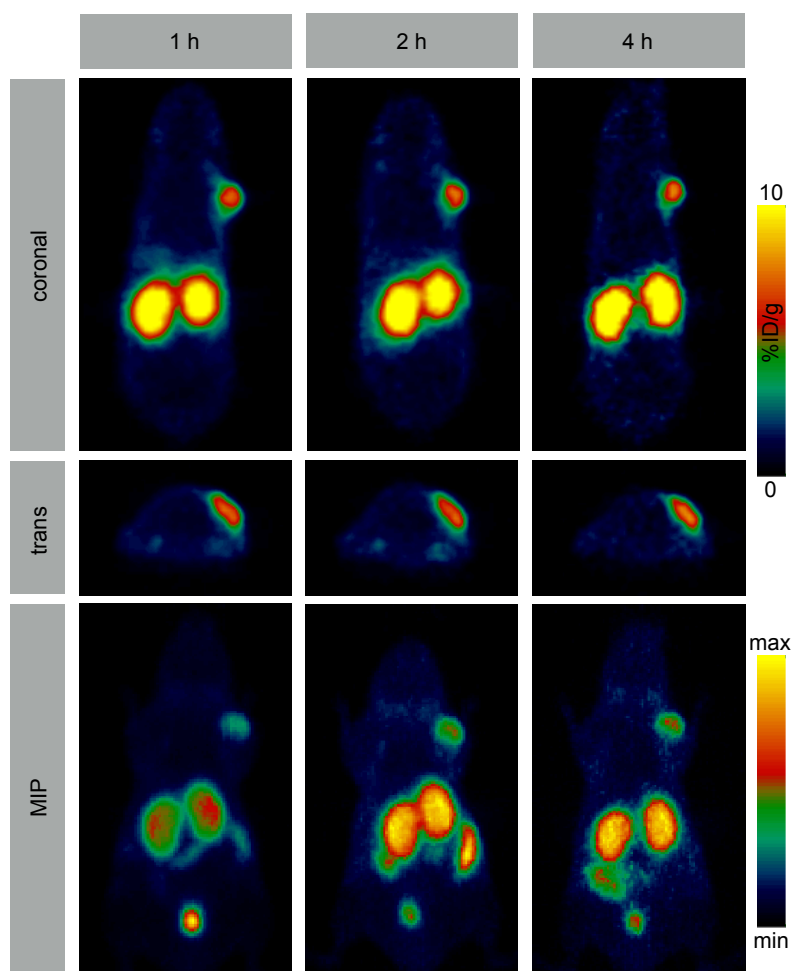

**Figure S2.** *In vivo* whole body PET imaging. Images were obtained 1 h, 2 h, and 4 h following intravenous administration of [ $^{68}\text{Ga}$ ]folate-NOTA (387  $\mu\text{Ci}$ , 3.1 nmol, 200  $\mu\text{l}$  PBS containing 10% ethanol) to a folate receptor-positive (KB) tumor bearing female nude mouse.

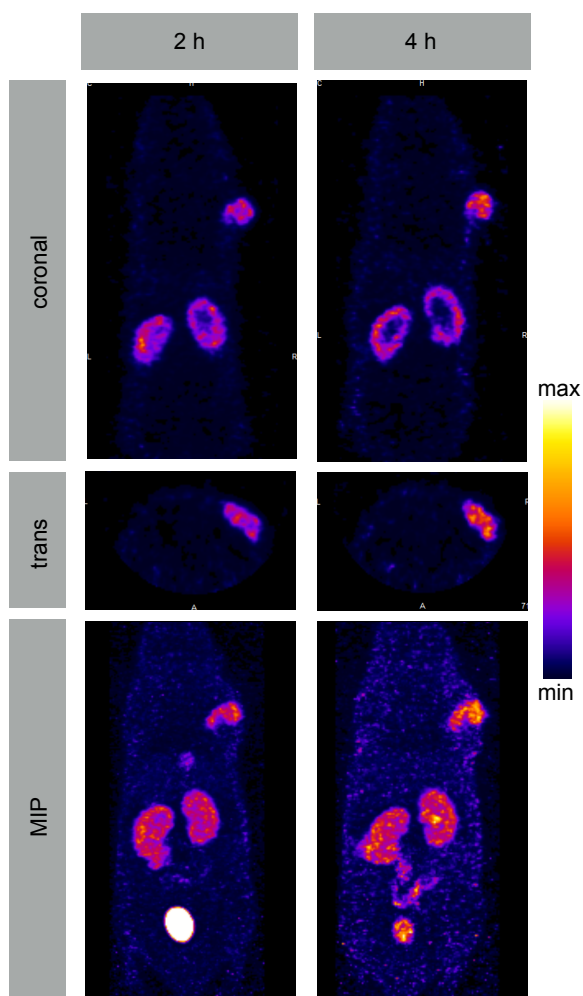

**Figure S3.** *In vivo* whole body SPECT imaging. Images were obtained 2 h and 4 h following intravenous administration of [ $^{99m}\text{Tc}$ ]EC20 (528  $\mu\text{Ci}$ , 3.1 nmol, 200  $\mu\text{l}$  PBS containing 10% ethanol) to a folate receptor-positive (KB) tumor bearing female nude mouse.

|                     | <sup>99m</sup> Tc-EC20 | <sup>68</sup> Ga-folate-NOTA | <sup>68</sup> Ga-folate-NOTA + EC20 |
|---------------------|------------------------|------------------------------|-------------------------------------|
| <b>Blood</b>        | 0.22 ± 0.05            | 0.07 ± 0.01                  | 0.37 ± 0.02                         |
| <b>Tumor</b>        | 7.88 ± 0.04            | 6.61 ± 1.07                  | 2.57 ± 0.45                         |
| <b>Heart</b>        | 0.95 ± 0.10            | 0.47 ± 0.04                  | 0.36 ± 0.03                         |
| <b>Lung</b>         | 0.56 ± 0.40            | 0.30 ± 0.17                  | 0.23 ± 0.04                         |
| <b>Liver</b>        | 2.48 ± 0.69            | 0.38 ± 0.08                  | 0.37 ± 0.07                         |
| <b>Spleen</b>       | 0.18 ± 0.13            | 0.36 ± 0.53                  | 0.14 ± 0.05                         |
| <b>Stomach</b>      | 1.32 ± 0.32            | 0.36 ± 0.08                  | 0.33 ± 0.10                         |
| <b>S. Intestine</b> | 0.90 ± 0.95            | 0.14 ± 0.12                  | 0.18 ± 0.04                         |
| <b>L. Intestine</b> | 0.87 ± 0.52            | 0.74 ± 0.52                  | 0.88 ± 0.80                         |
| <b>Kidney</b>       | 26.11 ± 0.62           | 21.65 ± 1.11                 | 11.32 ± 0.81                        |
| <b>Muscle</b>       | 0.39 ± 0.24            | 0.36 ± 0.15                  | 0.11 ± 0.01                         |
| <b>Bone</b>         | 0.29 ± 0.30            | 0.62 ± 0.94                  | 0.18 ± 0.10                         |
| <b>Tail</b>         | 0.73 ± 0.14            | 0.56 ± 0.14                  | 0.51 ± 0.20                         |
| <b>Skin</b>         | 1.01 ± 0.83            | 0.58 ± 0.21                  | 0.39 ± 0.04                         |

**Table S1.** Biodistribution data of KB tumor bearing nude mice (n = 3) after 4.5 h post injection of [<sup>99m</sup>Tc]EC20 (501 ± 11 µCi, 18.5 ± 0.4 MBq, 3.1 nmol, 200 µl PBS containing 10% ethanol), [<sup>68</sup>Ga]folate-NOTA (383 ± 53 µCi, 14.2 ± 2.0 MBq, 3.1 nmol, 200 µl PBS containing 10% ethanol), or [<sup>68</sup>Ga]folate-NOTA (222 ± 25 µCi, 8.2 ± 0.9 MBq, 3.1 nmol, 200 µl PBS containing 10% ethanol) co-injected with EC20 (12.5 nmol); all values are represented in mean %ID/g (n = 3) and include the standard deviation.

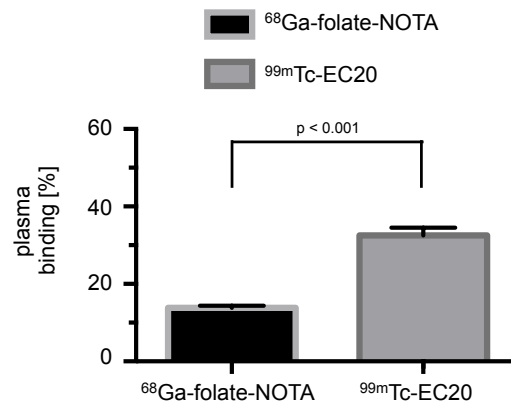

**Figure S4.** *In vitro* plasma binding studies of [ $^{68}\text{Ga}$ ]folate-NOTA and [ $^{99\text{m}}\text{Tc}$ ]EC20 after incubation (30 min) in human serum.

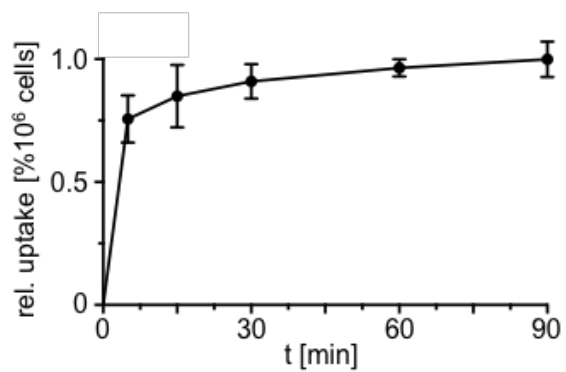

**Figure S5.** *In vitro* uptake assay using KB cells of [<sup>68</sup>Ga]NOTA-folate (100 nM) after incubation over 5 min, 15 min, 30 min, 60 min, and 90 min at 37 °C.
